# Supplementary material
Source: publisher figshare collection journal article supplement (https://springernature.figshare.com/ndownloader/files/14208206)
Supplement: Supplementary file [file 14208206]

The table provides percentage of individuals, among the 35 representative individuals selected for **A**: the uniphasic (green) and **B**: biphasic (red) viremia profiles, that had a profile inversion (PI) when boosting or inhibiting (depending on the profile) either mechanism (one at a time): infection (Inf), apoptosis (Ap), cytolysis by cytotoxic T lymphocytes (CyLc), neutralisation by antibodies (Neutr). Cytolysis by natural killers never resulted in a profile inversion (not shown).

Last rows in both tables: percentage for each mechanism (first 4 columns), or for at least one mechanism (last column). Other rows: percentage (last column) for and only for the mechanisms tagged by a ● (first 4 columns). For instance, all 35 individuals of the biphasic viremia profile had a profile inversion; 80% of these individuals changed to a uniphasic viremia profile when inhibiting apoptosis, out of which 54.3% of all 35 individuals also changed when boosting cytolysis or neutralisation, but not when inhibiting infection.

## A. uniphasic

| Inf     | Ap | CyLc | Neutr | % of PI |
|---------|----|------|-------|---------|
| ●       |    |      |       | 6       |
|         | ●  |      |       | 26      |
|         |    | ●    |       | 6       |
|         |    |      | ●     | 0       |
| ●       | ●  |      |       | 9       |
| ●       |    | ●    |       | 9       |
| ●       |    |      | ●     | 0       |
|         | ●  | ●    |       | 23      |
|         | ●  |      | ●     | 0       |
|         |    | ●    | ●     | 0       |
| ●       | ●  | ●    |       | 0       |
| ●       | ●  |      | ●     | 0       |
| ●       |    | ●    | ●     | 0       |
|         | ●  | ●    | ●     | 0       |
| ●       | ●  | ●    | ●     | 0       |
| % of PI | 23 | 57   | 37    | 0       |
|         |    |      |       | 77      |

## B. biphasic

| Inf     | Ap | CyLc | Neutr | % of PI |
|---------|----|------|-------|---------|
| ●       |    |      |       | 0       |
|         | ●  |      |       | 0       |
|         |    | ●    |       | 3       |
|         |    |      | ●     | 0       |
| ●       | ●  |      |       | 0       |
| ●       |    | ●    |       | 0       |
| ●       |    |      | ●     | 0       |
|         | ●  | ●    |       | 6       |
|         | ●  |      | ●     | 0       |
|         |    | ●    | ●     | 14      |
| ●       | ●  | ●    |       | 0       |
| ●       | ●  |      | ●     | 0       |
| ●       |    | ●    | ●     | 3       |
|         | ●  | ●    | ●     | 54      |
| ●       | ●  | ●    | ●     | 20      |
| % of PI | 23 | 80   | 91    | 100     |
